# Supplementary material for: Heat-resistant polyurethane films with great electrostatic dissipation capacity and very high thermally reversible self-healing efficiency based on multi-furan and liquid multi-maleimide polymers
Source: Royal Society of Chemistry journal article supplement (doi:10.1039/c6ta00953k), 2016-01-01
Supplement: c6ta00953k1.pdf [file c6ta00953k1.pdf]

Supporting Information

**Heat-resistant polyurethane film with great electrostatic dissipation  
capacity and very high thermally reversible self-healing efficiency  
based on multi-furan and liquid multi-maleimide polymers**

Gaohui Fu, Li Yuan, Guozheng Liang\* and Aijuan Gu\*

State and Local Joint Engineering Laboratory for Novel Functional Polymeric Materials  
Jiangsu Key Laboratory of Advanced Functional Polymer Design and Application  
Department of Materials Science and Engineering  
College of Chemistry, Chemical Engineering and Materials Science  
Soochow University, Suzhou 215123, China

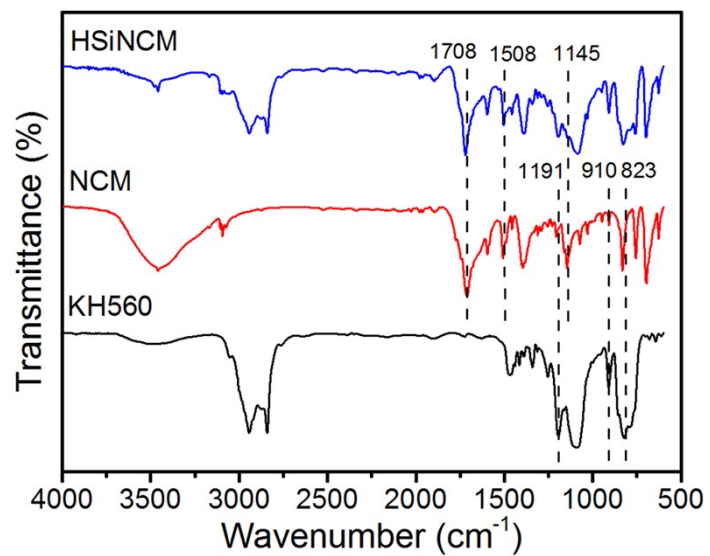

**Fig.S1** FTIR spectra of KH560, NCM and HSiNCM

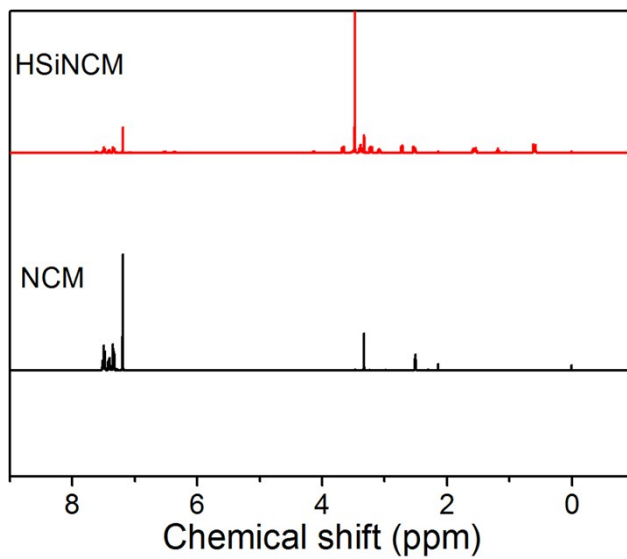

**Fig.S2** <sup>1</sup>H-NMR spectra of NCM and HSiNCM

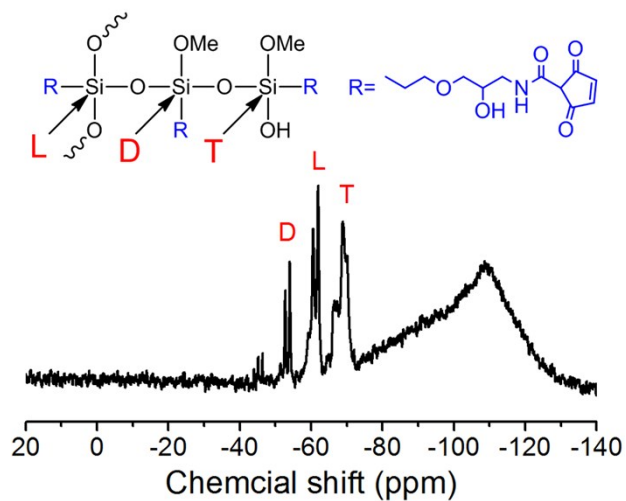

**Fig.S3** The  $^{29}\text{Si}$ -NMR spectrum of NCM and HSiNCM

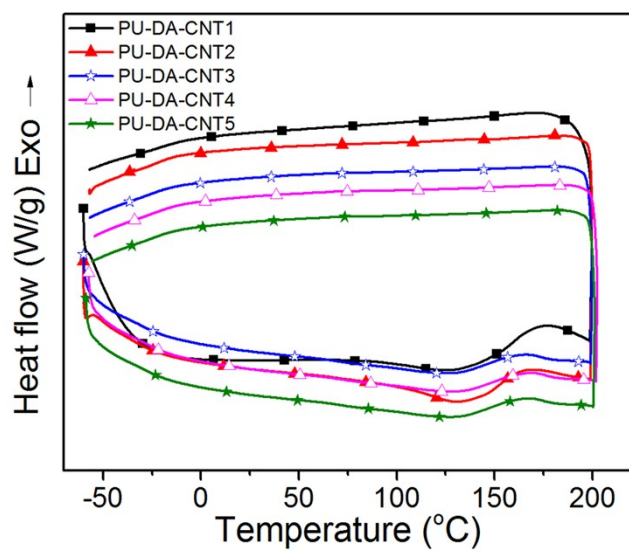

**Fig.S4** DSC curves of healing and cooling cycles of PU-DA-CNT films

Table S1 Compositions and electrostatic dissipation capacity of films <sup>a)</sup>

| Filler <sup>b)</sup>                    | Filler loading (wt%) | Polymer matrix <sup>c)</sup> | Surface resistivity        | Electrostatic decay | Resistivity or conductivity                     | Heat-resistance ( $T_{di}$ ) | Ref       |
|-----------------------------------------|----------------------|------------------------------|----------------------------|---------------------|-------------------------------------------------|------------------------------|-----------|
| CNT                                     | 1-2                  | Acrylic                      | $10^6$ - $1.6 \times 10^7$ | None                | None                                            | None                         | [S1]      |
| PEDOT                                   | 10-30                | PU                           | None                       | 0.09-0.17s (37%)    | $2.8 \times 10^{-8}$ -<br>$4.36 \times 10^{-7}$ | None                         | [S2]      |
| RGO                                     | 1.6 vol%             | TPU                          | None                       | 0.49s (37%)         | None                                            | None                         | [S3]      |
| CNF                                     | $\approx$ 5-7        | PEI                          | $10^6$ - $10^9$            | None                | None                                            | None                         | [S4]      |
| CNT                                     | 0.5-1                | Acrylic                      | $\approx 10^6$ - $10^9$    | None                | None                                            | None                         | [S5]      |
| [C <sub>4</sub> mim][Tf <sub>2</sub> N] | $10^3$ - $10^5$ ppm  | PU                           | $10^6$ - $10^9$            | None                | None                                            | None                         | [S6]      |
| CNT                                     | 1.96                 | PU                           | $3.094 \times 10^8$        | 0.07s (50%)         | $4.116 \times 10^{-8}$                          | 283                          | This work |

a) Some parameters not reported directly in the references are derived from the corresponding curves.

b) CNT: Carbon nanotubes; PEDOT: Poly(3,4-ethylene dioxythiophene); RGO: reduced graphene oxide; CNF: Cup-stacked carbon nanofibers; [C<sub>4</sub>mim][Tf<sub>2</sub>N]: 1-butyl-3-methylimidazolium bis(trifluoromethanesulfonyl)imide

c) Acrylic: Acrylic coatings; PU: Polyurethane coatings; TPU: Thermoplastic polyurethane PEI: Polyetherimide;

From Table S1 it is known that most publications provided only one or two properties to characterize electrostatic dissipation capacity of films. But in actual applications, it is necessary to measure the resistivity of both surface and body for a material as well as the dissipation speed of charge applied, so the three properties including surface resistivity, electrostatic decay and conductivity should be measured and analyzed. Compared with films reported previously, the film prepared herein has advantage of owning obviously better integrated properties of electrostatic dissipation capacity with a small loading of CNTs.

[S1] S. Kugler, K. Kowalczyk, T. Spychaj, *Progress in Organic Coatings*, 2016, **92**, 66-72.

[S2] M. Farukh, R. Dhawan, B. P. Singh, S. K. Dhawan, *RSC Advances*, 2015, **5**, 75229-75238.

[S3] M. Verma, P. Verma, S. K. Dhawan, V. Choudhary, *RSC Advances*, 2015, **5**, 97349-97358.

[S4] B. Li, W. H. Zhong, *Macromolecular Materials and Engineering*, 2010, **295**, 1136-1143.

[S5] S. Kugler, K. Kowalczyk, T. Spychaj, *Progress in Organic Coatings*, 2015, **85**, 1-7.

[S6] T. Iwata, A. Tsurumaki, S. Tajima, H. Ohno, *Macromolecular Materials and Engineering*, 2014, **299**, 794-798.
